# Supplementary material for: PD-L1 Dependent Immunogenic Landscape in Hot Lung Adenocarcinomas Identified by Transcriptome Analysis
Source: MDPI journal article supplement (doi:10.3390/cancers13184562), 2021-09-11
Supplement: s1 [file s1]

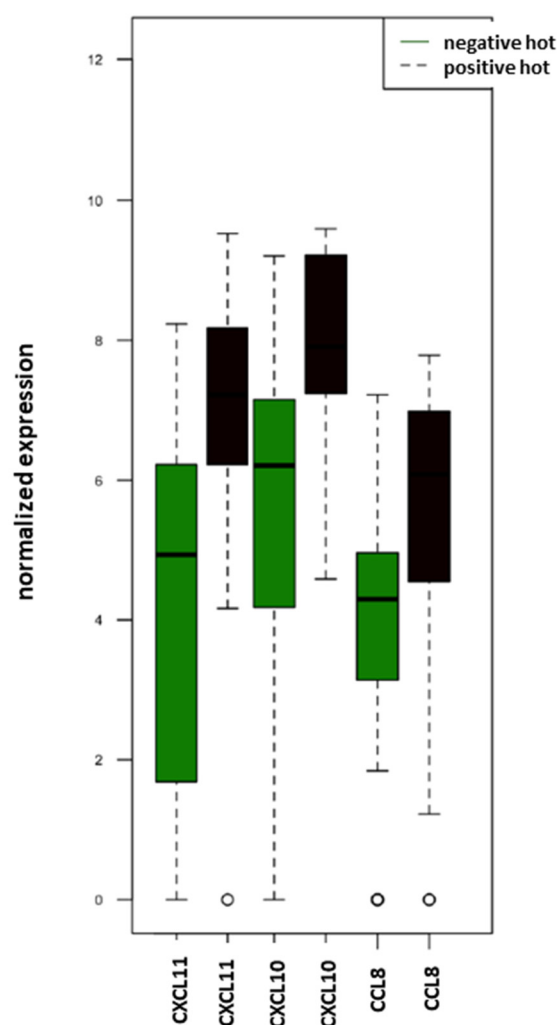

**Figure S2.** Boxplot of transcriptomic analysis showing over-expressed genes. Boxplot of transcriptomic analysis showing over-expressed genes CXCL11, CXCL10 and CCL8 in PH LUADs compared to NH counterparts encoding for chemokines associated with chemoattraction for T-cells and NK-cells.

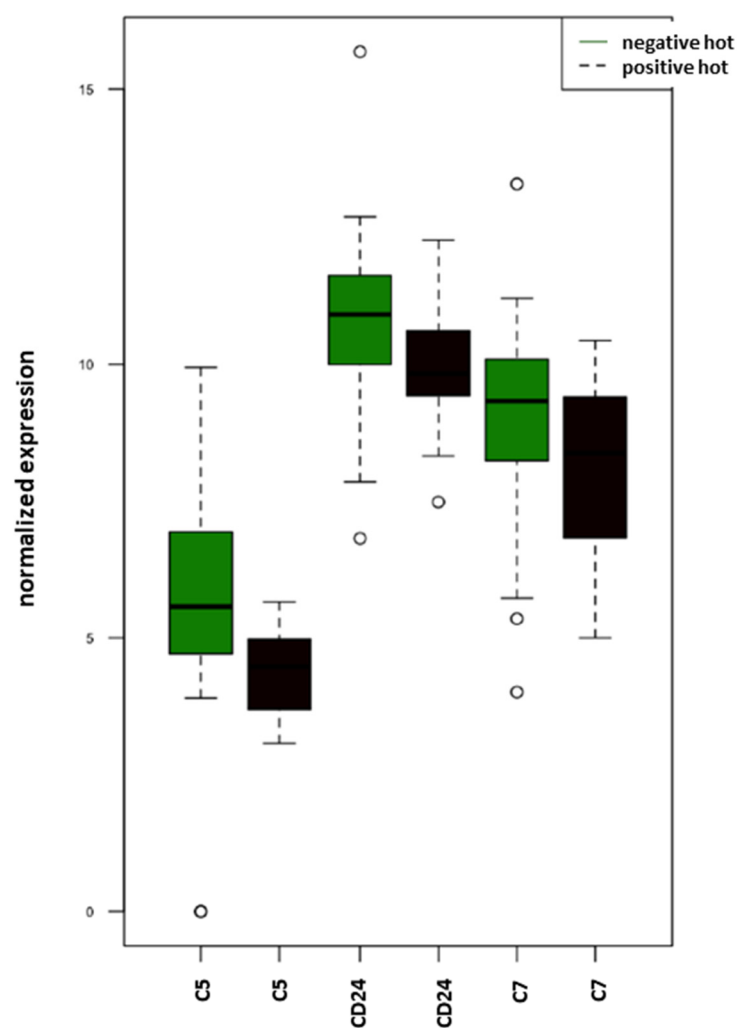

**Figure S3.** Boxplot of transcriptomic analysis showing down-regulated genes. Boxplot of transcriptomic analysis showing down-regulated genes C5, CD24 and C7 in PH LUADs compared to NH counterparts encoding for innate and adaptive immune response.

|       |      | TILs diffusely infiltrating tumor structures | TILs excluded from tumor structures | emphasis of TILs in the tumor margin | TILs not present | lymphfollicular structures at the margin | lymphfollicular structures intratumoral | CD8+ lymphocytes per area | CD4+ lymphocytes per area | CD8/CD4 quotient |
|-------|------|----------------------------------------------|-------------------------------------|--------------------------------------|------------------|------------------------------------------|-----------------------------------------|---------------------------|---------------------------|------------------|
| group | case |                                              |                                     |                                      |                  |                                          |                                         |                           |                           |                  |
| NC    | 1    |                                              | x                                   |                                      |                  |                                          |                                         | 5                         | 5                         | 1                |
| NC    | 2    |                                              | x                                   |                                      |                  |                                          |                                         | 15                        | 20                        | 0.75             |
| NC    | 3    |                                              | x                                   |                                      |                  |                                          |                                         | 5                         | 10                        | 0.5              |
| NC    | 4    |                                              | x                                   |                                      |                  | x                                        |                                         | 15                        | 5                         | 3                |
| NC    | 5    |                                              |                                     |                                      | x                |                                          |                                         | 2                         | 2                         | 1                |
| NC    | 6    |                                              | x                                   |                                      |                  | x                                        |                                         | 2                         | 5                         | 0.4              |
| NC    | 7    |                                              | x                                   |                                      |                  | x                                        |                                         | 5                         | 5                         | 1                |
| NC    | 8    |                                              |                                     |                                      | x                |                                          |                                         | 2                         | 2                         | 1                |
| NC    | 9    |                                              |                                     |                                      | x                |                                          |                                         | 2                         | 5                         | 0.4              |
| NC    | 10   |                                              | x                                   |                                      |                  |                                          |                                         | 5                         | 5                         | 1                |
| NC    | 11   |                                              | x                                   |                                      |                  |                                          | x                                       | 15                        | 20                        | 0.75             |
| NC    | 12   |                                              | x                                   |                                      |                  | x                                        | x                                       | 2                         | 10                        | 0.2              |
| NC    | 13   |                                              | x                                   |                                      |                  | x                                        |                                         | 20                        | 15                        | 1.3              |
| NC    | 14   |                                              | x                                   |                                      |                  |                                          |                                         | 5                         | 5                         | 1                |
| NC    | 15   |                                              | x                                   |                                      |                  | x                                        |                                         | 10                        | 15                        | 0.67             |
| NC    | 16   |                                              | x                                   |                                      |                  |                                          |                                         | 10                        | 15                        | 0.67             |
| NC    | 17   |                                              |                                     |                                      | x                |                                          |                                         | 2                         | 2                         | 1                |
| NC    | 18   |                                              | x                                   |                                      |                  |                                          |                                         | 2                         | 2                         | 1                |
| NC    | 19   |                                              | x                                   |                                      |                  |                                          |                                         | 5                         | 10                        | 0.5              |
| NC    | 20   |                                              | x                                   | x                                    |                  |                                          |                                         | 10                        | 15                        | 0.67             |
| NC    | 21   |                                              | x                                   |                                      |                  |                                          |                                         | 5                         | 10                        | 0.5              |
| NC    | 22   |                                              | x                                   |                                      |                  |                                          |                                         | 5                         | 5                         | 1                |
| NC    | 23   |                                              |                                     |                                      | x                |                                          |                                         | 2                         | 5                         | 0.4              |
| NC    | 24   |                                              | x                                   |                                      |                  |                                          |                                         | 5                         | 5                         | 1                |
| NC    | 25   |                                              | x                                   |                                      |                  |                                          |                                         | 10                        | 10                        | 1                |
| NC    | 26   |                                              | x                                   |                                      |                  |                                          | x                                       | 2                         | 5                         | 0.4              |
| NC    | 27   |                                              | x                                   |                                      |                  |                                          | x                                       | 5                         | 15                        | 0.3              |
| NC    | 28   |                                              |                                     | x                                    |                  | x                                        |                                         | 2                         | 5                         | 0.4              |
| NC    | 29   |                                              | x                                   | x                                    |                  |                                          |                                         | 10                        | 10                        | 1                |
| NC    | 30   |                                              |                                     |                                      | x                |                                          |                                         | 5                         | 5                         | 1                |
| NC    | 31   |                                              | x                                   |                                      |                  | x                                        |                                         | 10                        | 5                         | 2                |
| NC    | 32   |                                              | x                                   |                                      |                  |                                          | x                                       | 5                         | 10                        | 0.5              |
| NC    | 33   |                                              |                                     |                                      | x                |                                          |                                         | 15                        | 20                        | 0.75             |
| NC    | 34   |                                              | x                                   |                                      |                  | x                                        |                                         | 5                         | 10                        | 0.5              |
| NC    | 35   |                                              | x                                   |                                      |                  | x                                        |                                         | 5                         | 5                         | 1                |
| NC    | 36   |                                              | x                                   |                                      |                  | x                                        |                                         | 2                         | 5                         | 0.4              |
| NC    | 37   |                                              | x                                   |                                      |                  |                                          |                                         | 5                         | 10                        | 0.5              |
| NC    | 38   |                                              | x                                   |                                      |                  | x                                        |                                         | 2                         | 2                         | 1                |
| NC    | 39   |                                              | x                                   | x                                    |                  |                                          |                                         | 10                        | 15                        | 0.67             |
| NC    | 40   |                                              | x                                   |                                      |                  |                                          |                                         | 5                         | 10                        | 0.5              |
| NC    | 41   |                                              | x                                   |                                      |                  |                                          |                                         | 5                         | 10                        | 0.5              |
| NC    | 42   |                                              | x                                   |                                      |                  |                                          | x                                       | 5                         | 5                         | 1                |
| NC    | 43   |                                              | x                                   |                                      |                  |                                          | x                                       | 5                         | 10                        | 0.5              |
| NC    | 44   |                                              |                                     |                                      | x                |                                          |                                         | 5                         | 5                         | 1                |
| NC    | 45   |                                              | x                                   | x                                    |                  |                                          |                                         | 5                         | 10                        | 0.5              |
| NC    | 46   |                                              | x                                   | x                                    |                  |                                          |                                         | 15                        | 15                        | 1                |
| NC    | 47   |                                              | x                                   |                                      |                  |                                          | x                                       | 15                        | 20                        | 0.75             |
| NC    | 48   |                                              |                                     |                                      | x                |                                          |                                         | 15                        | 20                        | 0.75             |
| NC    | 49   |                                              |                                     |                                      | x                |                                          |                                         | 2                         | 5                         | 0.4              |
| NC    | 50   |                                              |                                     |                                      | x                |                                          |                                         | 10                        | 5                         | 2                |
| NC    | 51   |                                              |                                     |                                      | x                |                                          |                                         | 5                         | 15                        | 0.33             |
| NC    | 52   |                                              | x                                   |                                      |                  |                                          |                                         | 5                         | 10                        | 0.5              |
| NC    | 53   |                                              | x                                   |                                      |                  |                                          |                                         | 10                        | 20                        | 0.5              |
| NC    | 54   |                                              | x                                   | x                                    |                  |                                          |                                         | 5                         | 20                        | 0.25             |
| NC    | 55   |                                              | x                                   |                                      |                  |                                          |                                         | 10                        | 10                        | 1                |

|    |    |   |   |   |  |   |   |     |    |       |
|----|----|---|---|---|--|---|---|-----|----|-------|
| NH | 1  |   | x | x |  | x |   | 20  | 25 | 0.8   |
| NH | 2  | x |   |   |  | x |   | 10  | 20 | 0.5   |
| NH | 3  |   | x | x |  | x |   | 15  | 25 | 0.6   |
| NH | 4  | x |   |   |  |   |   | 0.1 | 20 | 0.005 |
| NH | 5  |   | x | x |  | x |   | 10  | 10 | 1     |
| NH | 6  |   | x |   |  |   |   | 10  | 20 | 0.5   |
| NH | 7  | x |   |   |  |   |   |     |    |       |
| NH | 8  | x |   |   |  |   |   | 20  | 20 | 1     |
| NH | 9  | x |   |   |  |   | x | 10  | 25 | 0.4   |
| NH | 10 | x |   |   |  |   | x | 10  | 20 | 0.5   |
| NH | 11 | x |   |   |  | x |   | 20  | 30 | 0.67  |
| NH | 12 | x |   |   |  |   | x | 10  | 20 | 0.5   |
| NH | 13 | x |   |   |  |   | x | 10  | 40 | 0.25  |
| NH | 14 |   | x |   |  | x | x | 0.1 | 25 | 0.004 |
| NH | 15 |   | x |   |  | x |   | 5   | 10 | 0.5   |
| NH | 16 |   | x |   |  | x | x | 15  | 20 | 0.75  |
| NH | 17 |   | x |   |  |   | x | 5   | 40 | 0.13  |
| NH | 18 | x |   |   |  |   |   | 25  | 10 | 2.5   |
| NH | 19 |   | x |   |  | x |   | 5   | 15 | 0.33  |
| NH | 20 |   | x | x |  | x |   | 10  | 25 | 0.4   |
| NH | 21 |   | x |   |  | x | x | 10  | 20 | 0.5   |
| NH | 22 |   | x |   |  | x | x | 10  | 15 | 0.67  |
| NH | 23 | x |   |   |  |   |   | 15  | 15 | 1     |
| NH | 24 |   | x |   |  | x | x | 5   | 10 | 0.5   |
| NH | 25 |   | x |   |  |   | x | 5   | 15 | 0.33  |
| NH | 26 |   | x |   |  | x |   | 20  | 35 | 0.57  |
| NH | 27 | x |   |   |  |   |   | 10  | 10 | 1     |
| NH | 28 | x |   |   |  | x |   | 10  | 20 | 0.5   |
| NH | 29 | x |   |   |  |   |   | 15  | 25 | 0.6   |
| NH | 30 | x |   |   |  | x |   | 10  | 25 | 0.4   |
| NH | 31 |   | x |   |  |   |   | 10  | 10 | 1     |
| NH | 32 | x |   |   |  |   |   | 5   | 15 | 0.33  |
| NH | 33 |   | x |   |  | x |   | 20  | 20 | 1     |
| NH | 34 |   | x |   |  | x |   | 5   | 5  | 1     |
| NH | 35 |   | x |   |  | x |   | 5   | 10 | 0.5   |
| NH | 36 | x |   |   |  |   |   | 15  | 20 | 0.75  |
| NH | 37 | x |   |   |  |   |   | 20  | 25 | 0.8   |
| NH | 38 | x |   | x |  | x |   | 15  | 15 | 1     |
| NH | 39 |   | x |   |  | x |   | 15  | 20 | 0.75  |
| NH | 40 |   | x |   |  | x | x | 20  | 40 | 0.5   |
| NH | 41 |   | x |   |  |   |   | 10  | 15 | 0.67  |
| NH | 42 |   | x | x |  | x |   | 20  | 15 | 1.33  |
| NH | 43 |   | x |   |  |   |   | 5   | 10 | 0.5   |
| NH | 44 |   | x | x |  | x |   | 5   | 10 | 0.5   |
| NH | 45 | x |   |   |  |   |   | 15  | 25 | 0.6   |
| NH | 46 | x |   |   |  | x |   | 20  | 15 | 1.33  |
| NH | 47 |   | x |   |  |   |   | 5   | 10 | 0.5   |
| NH | 48 | x |   |   |  | x |   | 30  | 40 | 0.75  |
| NH | 49 |   | x |   |  |   | x | 5   | 15 | 0.33  |
| NH | 50 |   | x |   |  | x | x | 15  | 25 | 0.6   |
| NH | 51 | x |   |   |  |   | x | 15  | 20 | 0.75  |
| NH | 52 |   | x |   |  | x | x | 10  | 20 | 0.5   |
| NH | 53 | x |   |   |  | x |   | 15  | 20 | 0.75  |

|    |    |   |   |   |   |   |   |    |    |      |
|----|----|---|---|---|---|---|---|----|----|------|
|    |    |   |   |   |   |   |   |    |    |      |
| PC | 1  |   |   |   | x |   |   | 15 | 20 | 0.75 |
| PC | 2  |   |   |   | x |   |   | 10 | 15 | 0.67 |
| PC | 3  |   | x | x |   |   |   | 20 | 10 | 2    |
| PC | 4  |   | x | x |   |   |   | 10 | 15 | 0.67 |
| PC | 5  |   |   |   | x |   |   | 10 | 15 | 0.67 |
| PC | 6  |   | x | x |   |   |   |    |    |      |
| PC | 7  |   | x |   |   | x | x | 15 | 20 | 0.75 |
|    |    |   |   |   |   |   |   |    |    |      |
| PH | 1  | x |   |   |   |   |   | 40 | 50 | 0.8  |
| PH | 2  |   | x | x |   |   |   | 15 | 20 | 0.75 |
| PH | 3  |   | x | x |   |   |   | 40 | 50 | 0.8  |
| PH | 4  |   | x |   |   |   |   | 20 | 25 | 0.8  |
| PH | 5  | x |   |   |   |   |   | 40 | 45 | 0.88 |
| PH | 6  | x |   |   |   |   |   | 20 | 30 | 0.67 |
| PH | 7  | x |   |   |   | x | x | 2  | 5  | 0.4  |
| PH | 8  |   | x | x |   |   |   | 25 | 15 | 1.67 |
| PH | 9  | x |   |   |   |   |   | 10 | 15 | 0.67 |
| PH | 10 | x |   |   |   |   |   | 15 | 40 | 0.38 |
| PH | 11 | x |   |   |   |   |   | 20 | 30 | 0.67 |
| PH | 12 | x |   |   |   |   |   | 40 | 20 | 2    |
| PH | 13 | x |   |   |   |   |   | 20 | 40 | 0.5  |
| PH | 14 | x |   |   |   |   |   | 25 | 15 | 1.67 |
| PH | 15 | x |   |   |   |   |   | 30 | 20 | 1.5  |
| PH | 16 |   | x |   |   | x |   | 25 | 30 | 0.83 |
| PH | 17 | x |   | x |   |   |   | 15 | 15 | 1    |
| PH | 18 | x |   |   |   |   |   | 25 | 15 | 1.67 |
| PH | 19 |   | x |   |   | x | x | 10 | 20 | 0.5  |
| PH | 20 | x |   |   |   |   |   | 50 | 15 | 3.33 |
| PH | 21 | x |   |   |   |   |   | 20 | 5  | 4    |
| PH | 22 | x |   |   |   |   | x | 40 | 15 | 2.67 |
| PH | 23 | x |   |   |   |   |   | 20 | 15 | 1.33 |

**Figure S4.** Overview of lymphocytic infiltration pattern of each case.
